# Supplementary material for: A Novel Au@Cu2O-Ag Ternary Nanocomposite with Highly Efficient Catalytic Performance: Towards Rapid Reduction of Methyl Orange Under Dark Condition
Source: PubMed Central journal article supplement (PMC7023264; doi:10.3390/nano10010048), 2019-12-24
Supplement: nanomaterials-10-00048-s001.pdf [file nanomaterials-10-00048-s001.pdf]

# A novel Au@Cu<sub>2</sub>O-Ag ternary nanocomposite with highly efficient catalytic performance: Towards rapid reduction of methyl orange under dark condition

Tong Wu <sup>1,2</sup>, Yichuan Kou <sup>1,2</sup>, Hui Zheng <sup>1,2</sup>, Jianing Lu <sup>1,2</sup>, Naveen Reedy Kadasala <sup>3</sup>, Shuo Yang <sup>4</sup>, Chenzi Guo <sup>4</sup>, Yang Liu <sup>1,2,\*</sup> and Ming Gao <sup>1,2,\*</sup>

<sup>1</sup> College of Physics, Jilin Normal University, Siping 136000, China; wwwttcn@126.com (T.W.); yichuankou@163.com (Y.K.); hzzh963@126.com (H.Z.); jianing3327539943@163.com (J.L.)

<sup>2</sup> Key Laboratory of Functional Materials Physics and Chemistry of the Ministry of Education, Jilin Normal University, Changchun 130103, China

<sup>3</sup> Department of Chemistry, Towson University, Towson, MD 21252, United State; naveenkadasala@gmail.com (N.K.)

<sup>4</sup> Changchun Institute of Optics, Fine Mechanics and Physics, Chinese Academy of Sciences, Changchun 130033, China; yangshuo\_2011@163.com (S.Y.); guocz@ciomp.ac.cn (C.G.)

\* Correspondence: liuyang@jlnu.edu.cn (Y.L.); gaomingphy@126.com (M.G.); Tel./Fax: +86-434-329-4566 (Y.L. & M.G.)

Figure S1

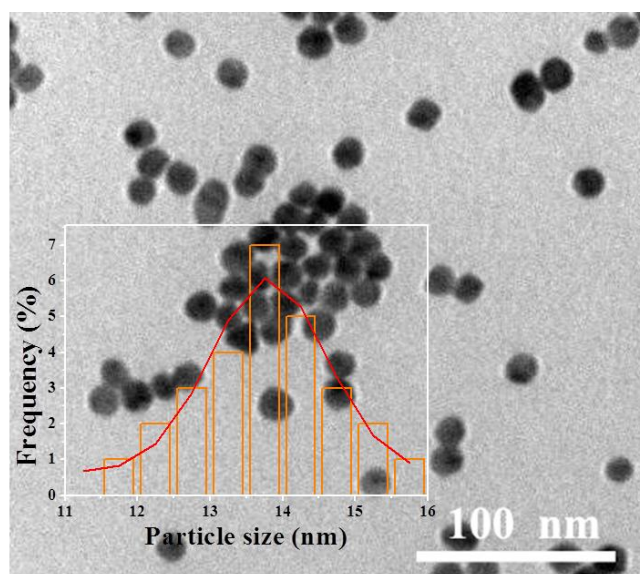

Figure S1. TEM image of the Au nanocrystals, the insert is the particle size distribution.

Figure S2

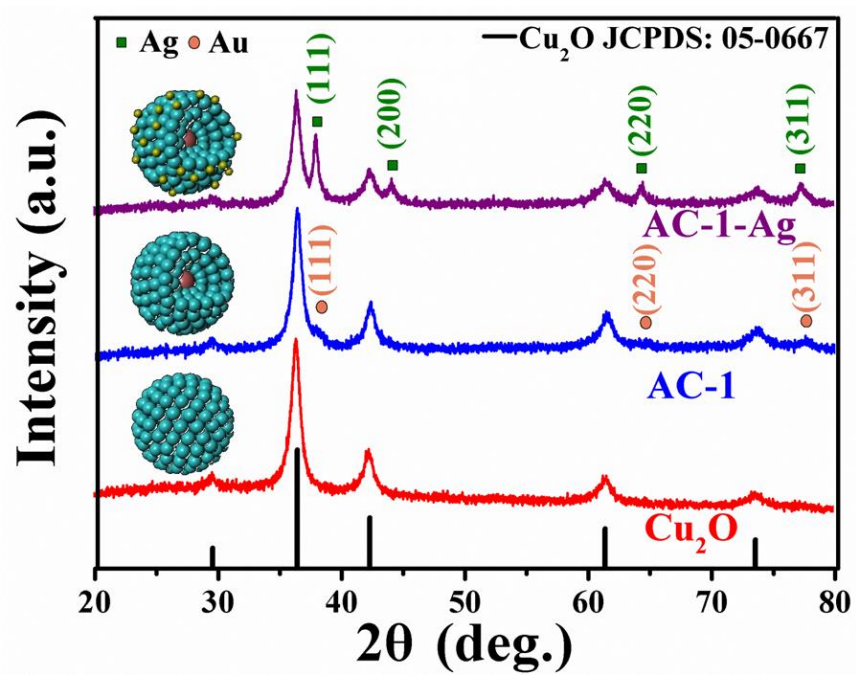

Figure S2. XRD patterns of  $\text{Cu}_2\text{O}$  nanocrystals, AC-1 NCs and AC-1-Ag NCs.

Figure S3

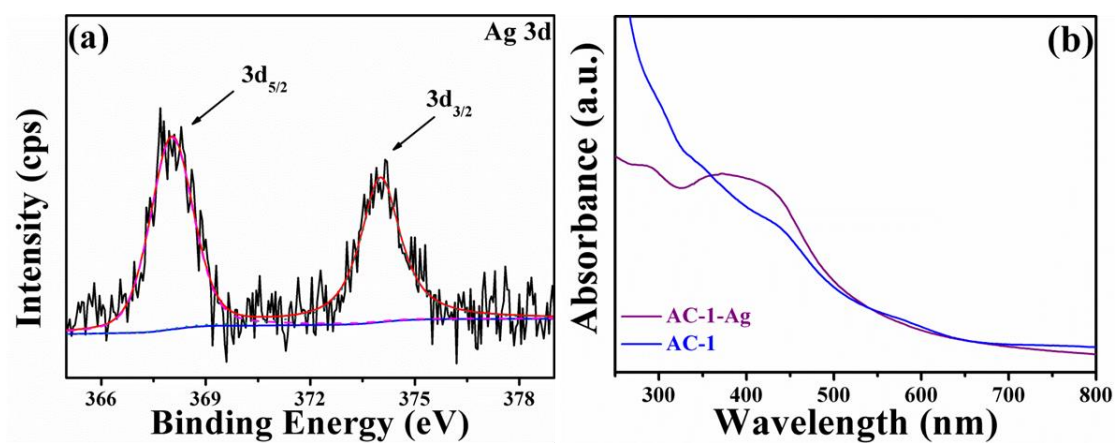

Figure S3. High resolution XPS scans of Ag 3d for AC-1-Ag NCs (a) and UV-Vis absorbance spectra (b) of AC-1 NCs and AC-1-Ag NCs.

Figure S4

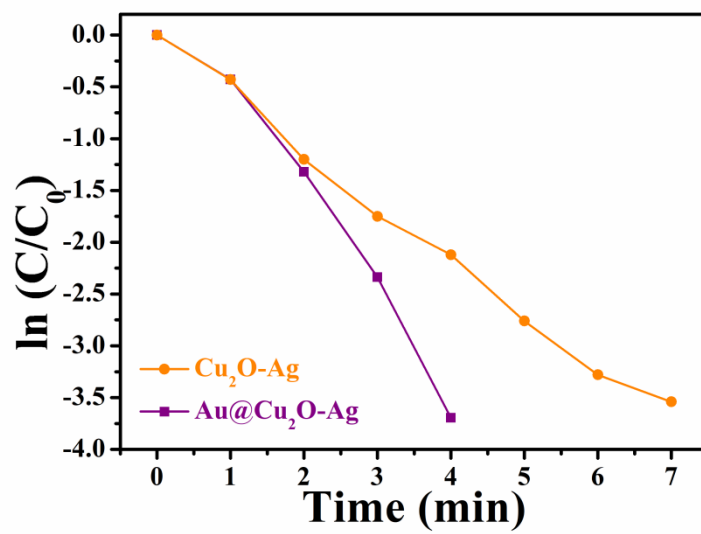

Figure S4. Time-dependent efficiency of degrading MO solution catalyzed by  $\text{Au@Cu}_2\text{O-Ag}$  NCs and  $\text{Cu}_2\text{O-Ag}$  NCs.
